# Supplementary material for: Buoyancy and polarity driven accumulation of dissolved organic matter in the sea surface microlayer during a phytoplankton bloom
Source: Copernicus journal article supplement (doi:10.5194/egusphere-2025-6563), 2026-01-13
Supplement: Supplementary file 1 [file egusphere-2025-6563-supplement.pdf]

# Buoyancy and polarity driven accumulation of dissolved organic matter in the sea surface microlayer during a phytoplankton bloom

Jasper Zöbelein<sup>1</sup>, Shubham Sawle<sup>2</sup>, Gernot Friedrichs<sup>2,3</sup>, Mariana Ribas-Ribas<sup>1</sup>, Carola Lehnert<sup>1</sup>, Katharina Paetz<sup>1</sup>, Maximilian Pflaum<sup>2</sup>, Hannelore Waska<sup>1</sup>

5 <sup>1</sup>Institute for Chemistry and Biology of the Marine Environment (ICBM), School of Mathematics and Science, Carl von Ossietzky Universität Oldenburg, Oldenburg, Germany

<sup>2</sup>Institute of Physical Chemistry, Christian-Albrechts-University Kiel, Kiel, Germany

<sup>3</sup>KMS Kiel Marine Science-Centre for Interdisciplinary Marine Science, Kiel University, Kiel, Germany

Correspondence to: Jasper Zöbelein ([jasper.zoebelein@uni-oldenburg.de](mailto:jasper.zoebelein@uni-oldenburg.de))

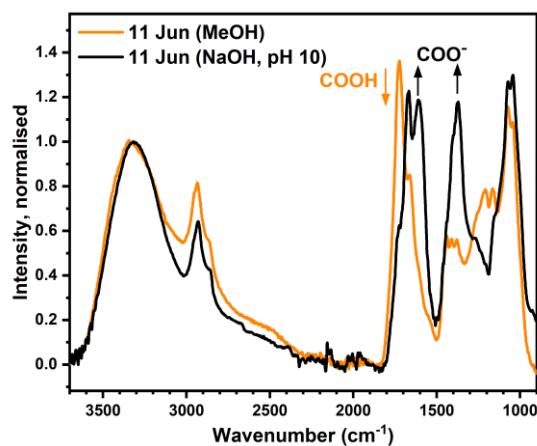

10 **Fig. S1: FTIR spectra of DOM deposits on the ATR crystals from MeOH and NaOH (pH = 10) solution, respectively. For better comparison, the two spectra have been normalised with respect to the maximum of the broad OH/NH band at 3300 cm<sup>-1</sup>. As it is outlined in the main text, the very pronounced changes in the spectral signature indicates a high abundance of carboxyl/carboxylate functional groups.**

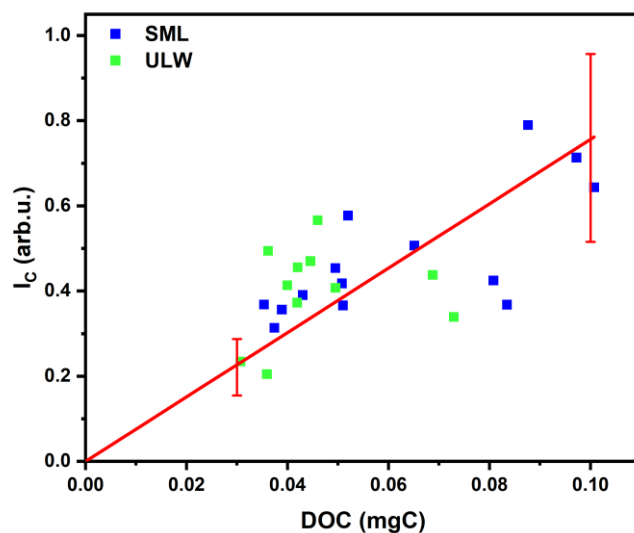

Fig. S2: Correlation between dissolved organic carbon (DOC, mg C in extract) versus integrated ATR-FTIR absorbance of carbon-containing functional groups ( $I_C$ ; sum of all peak areas, except peaks related to O-H/N-H stretching). The solid line corresponds to a linear fit:  $I_C = (7.56 \pm 0.44) \times \text{DOC}$  (with fixed intercept,  $r = 0.96$ ,  $p < 0.0001$ ).  
 20 By using the ratio  $I_C/m$  as a mass balance correction factor (see main text), it is implicitly assumed that the scatter in the plot is mainly due to the limited reproducibility of the ATR-FTIR analysis and that the DOC measurement is reliable. The error bars indicate the  $\pm 30\%$  ( $1\sigma$  standard deviation) uncertainty of the FTIR measurements from the reference experiments using Triton-X 100. Considering that the experimental data points correspond to the mean of 3-7 individual measurements, the data points exhibit a higher scatter than expected from these reference measurements  
 25 - presumably indicating the sample-to-sample variability of the DOM pool.

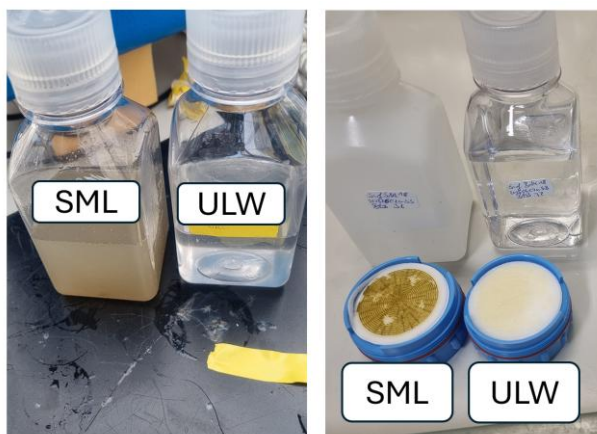

Fig S3: Left: unfiltered samples of SML and ULW during the post-bloom phase. Right: Filters of the same samples showing high amounts of POC accumulating in the SML sample and being removed by filtration.

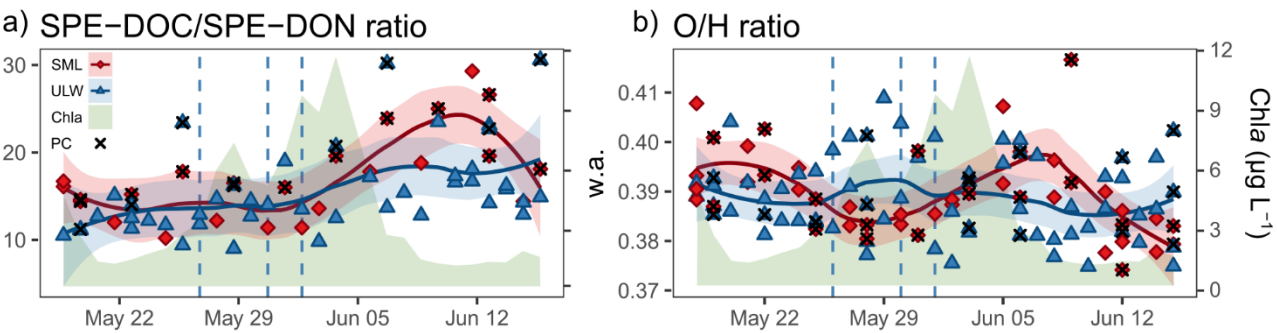

**Fig S4: a) Solid-phase extract (SPE)-DOC / DON ratio; b) weighted averaged (w.a.) O/H ratio. SML in red, ULW in blue; the green area indicates Chla development; dotted line indicates nutrient addition; black cross indicates poly carbonate filter, with GFF as default.**

**Table S1: Selected peak positions with constraing FWHM for spectral decomposition of the ATR-FTIR spectra.**

| peak no. | peak center<br>(cm <sup>-1</sup> ) | constrained FWHM range<br>(cm <sup>-1</sup> ) |
|----------|------------------------------------|-----------------------------------------------|
| 1        | 1065                               | 50-200                                        |
| 2        | 1165                               | 50-100                                        |
| 3        | 1215                               | 50-100                                        |
| 4        | 1310                               | 50-300                                        |
| 5        | 1390                               | 50-200                                        |
| 6        | 1445                               | 50-200                                        |
| 7        | 1665                               | 50-200                                        |
| 8        | 1730                               | 50-200                                        |
| 9        | 2510                               | 30-500                                        |
| 10       | 2930                               | 50-500                                        |
| 11       | 2940                               | 50-100                                        |
| 12       | 3185                               | 50-500                                        |
| 13       | 3390                               | 30-500                                        |

50 **Table S2: Assignment for the 13 spectrally decomposed ATR-FTIR peaks for SML and ULW DOM samples (Socrates 2001 and listed references).**

| $\tilde{\nu}$ (cm <sup>-1</sup> ) | designation in main text | assignment                                                  | typical compound                                             | references                                                                                                 |
|-----------------------------------|--------------------------|-------------------------------------------------------------|--------------------------------------------------------------|------------------------------------------------------------------------------------------------------------|
| <b>3390, 3185, 2930</b>           | <b>N-H/O-H</b>           | O–H stretch with possible minor N–H “amide A” contribution  | alcohols, phenols, amines                                    | Laurson et al. 2020<br>Pärnpuu et al. 2022<br>Božič et al. 2018<br>Yan Ji et al. 2020<br>Minor et al. 2008 |
| <b>2940</b>                       | <b>C-H</b>               | aliphatic C–H stretches (CH <sub>3</sub> /CH <sub>2</sub> ) | fatty acids, lipids/aliphatic, polysaccharides/carbohydrates | Rong Lu et al. 2005<br>Pärnpuu et al. 2022<br>Minor et al. 2008<br>Artz et al. 2008                        |
| <b>2510</b>                       | <b>N-H/O-H</b>           | broad acid O–H envelope tail or aromatic ester              | carboxylic acids, aromatic esters                            | Minor et al. 2008                                                                                          |
| <b>1730</b>                       | <b>C=O</b>               | C=O stretch                                                 | carboxylic acids, esters                                     | Artz et al. 2008<br>Minor et al. 2008                                                                      |
| <b>1665</b>                       | <b>amide I</b>           | amide I, C=C                                                | proteinaceous compounds, unsaturated lipids                  | Yan Ji et al. 2020<br>Minor et al. 2008<br>Abdulla et. al. 2010                                            |
| <b>1445, 1390</b>                 |                          | C-H deformation, OH in- plane bending                       | aliphatic compounds                                          | Artz et al. 2008<br>Abdulla et. al. 2010                                                                   |
| <b>1309</b>                       |                          | C–O stretch of aromatic ester/aryl–O or amide III band      |                                                              | Artz et al. 2008<br>Yan Ji et al. 2020                                                                     |
| <b>1215, 1165</b>                 |                          | C–O stretch, C-O-C                                          | esters, ethers, secondary alcohols                           | Minor et al. 2008                                                                                          |
| <b>1065</b>                       | <b>C-O/C-O-C</b>         | C–O stretch glycosidic C-O-C                                | polysaccharides/carbohydrates                                | Pärnpuu et al. 2022<br>Abdulla et.al 2010<br>Minor et al. 2008<br>Artz et al. 2008                         |

a) Carbohydrates (relative)

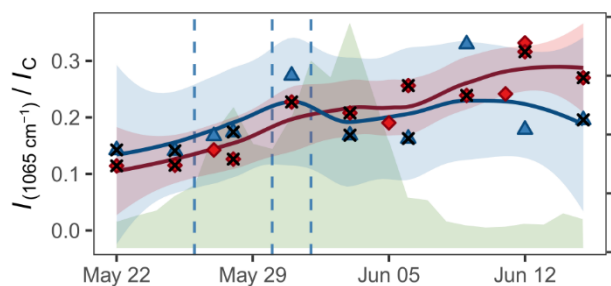

b) Proteins (relative)

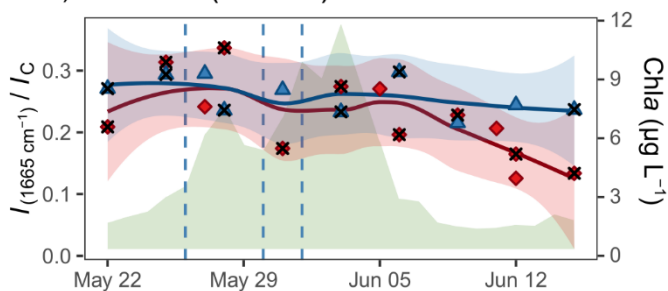

55 **Fig. S5** The relative FTIR spectral intensity trend of the 1065 cm<sup>-1</sup> band characteristic of carbohydrate-like substances and the 1665 cm<sup>-1</sup> band characteristic of amide-I stretch vibration in protein-like substances, respectively. SML in red, ULW in blue; the green area indicates Chla development; the dotted line indicates nutrient addition; the black cross indicates a polycarbonate filter, with GFF as default.

a) C-H stretch (absolute)

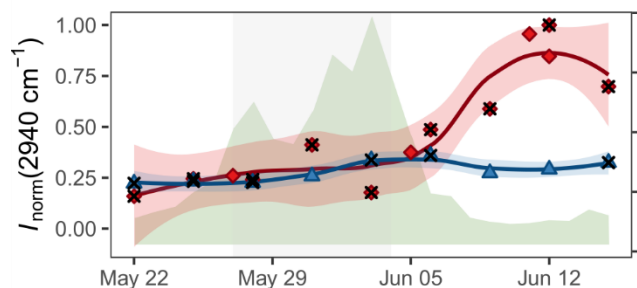

b) C-H stretch (relative)

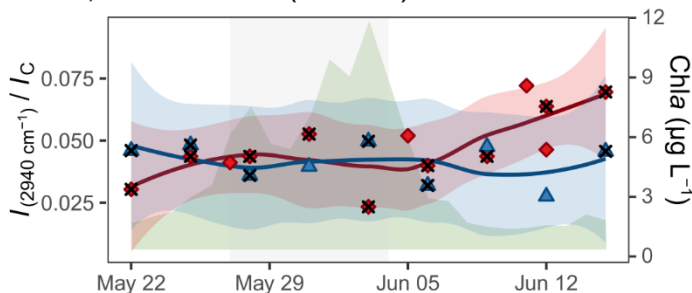

60 **Fig. S6:** The absolute and relative spectral intensity trend of the 2940 cm<sup>-1</sup> band assigned to C-H stretch is highlighted for the SML (red symbols and LOESS trend line) and the ULW (blue symbol and trend line) in panels (a) and (b). The green area indicates Chla development, dotted lines indicate nutrient additions, and black crosses indicate poly carbonate filter extracts, with GFF as default.  $I_C$  corresponds to the total integral of carbon-containing functional group peaks.

O-H / N-H stretch (absolute)

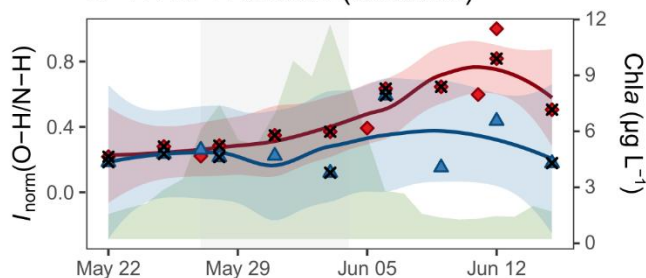

65

**Fig. S7:** The absolute intensity trend of the O-H / N-H vibrations (3390, 3185, 2930 and 2510 cm<sup>-1</sup>) is highlighted for the SML (red symbols and LOESS trend line) and the ULW (blue symbol and trend line) in panel. The green area indicates Chla development, dotted lines indicate nutrient additions, and black crosses indicate poly carbonate filter extracts, with GFF as default.

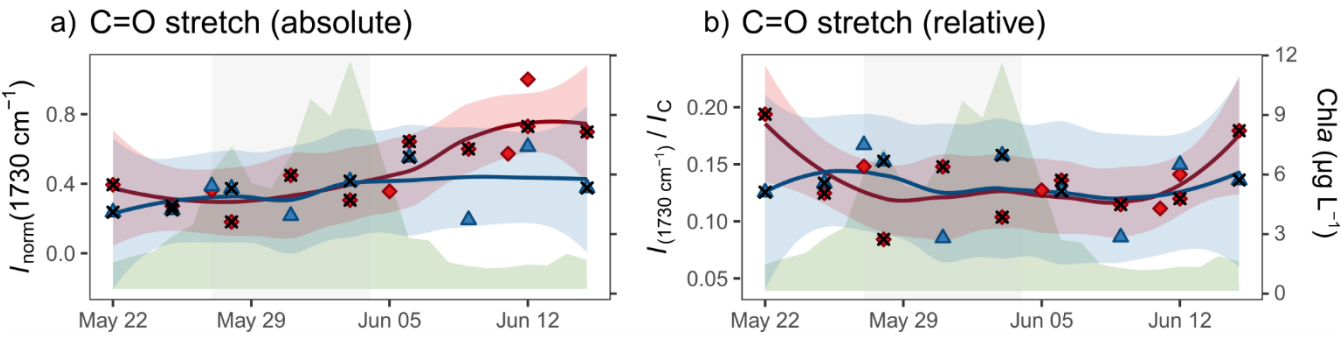

**Fig S8:** The absolute and relative spectral intensity trend of the 1730 cm<sup>-1</sup> assigned to carboxylic acid is highlighted for the SML (red symbols and LOESS trend line) and the ULW (blue symbol and trend line) in panels (a) and (b), which is highlighted. The green area indicates Chl a development, dotted lines indicate nutrient additions, and black crosses indicate poly carbonate filter extracts, with GFF as default.

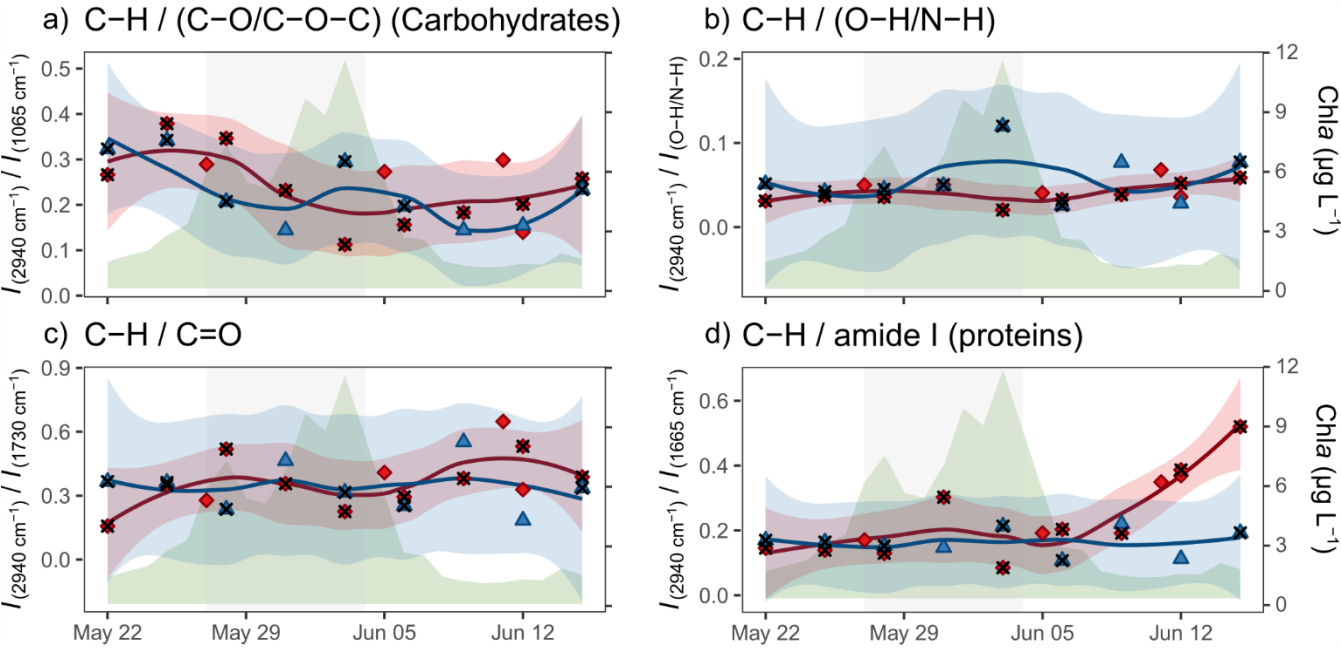

**Fig S9 a):** FTIR spectral ratio trends for a) Ratios C-H / (C-O / C-O-C) (1065 cm<sup>-1</sup>), b) C-H / (O-H / N-H) (3390, 3185, 2930, 2510 cm<sup>-1</sup>), c) C-H / C=O (1730 cm<sup>-1</sup>) and d) C-H / amide I (1665 cm<sup>-1</sup>). SML in red, ULW in blue; the green area indicates Chl a development; dotted line indicates nutrient addition; black cross indicates poly carbonate filter, with GFF as default.

Tab. S3: DOM characteristics of mesocosm study samples during the bloom phases as well as reference values for natural water samples.

| Origin                      | Depth               | H/C<br>(w.a.) | O/C<br>(w.a.)  | I <sub>DEG</sub> | MLB <sub>WL</sub> | AI <sub>mod</sub><br>(w.a.) | I <sub>bio</sub> | I <sub>photo</sub> | Carbo-<br>hydrate-like<br>(w.a. %) | Lipid-like<br>(w.a. %) |
|-----------------------------|---------------------|---------------|----------------|------------------|-------------------|-----------------------------|------------------|--------------------|------------------------------------|------------------------|
| pre-bloom                   | SML<br>n=14         | 1.20<br>±0.01 | 0.46<br>±0.01  | 0.52<br>±0.05    | 5.87<br>±0.39     | 0.29<br>±0.01               | 0.54<br>±0.05    | 0.36<br>±0.02      | 0.33<br>±0.09                      | 0.07<br>±0.03          |
|                             | ULW<br>n=24         | 1.20<br>±0.01 | 0.45<br>±0.01  | 0.53<br>±0.04    | 5.83<br>±0.37     | 0.29<br>±0.00               | 0.52<br>±0.05    | 0.36<br>±0.02      | 0.32<br>±0.10                      | 0.07<br>±0.04          |
|                             | t-test /<br>p-value | 0.63          | 0.91           | 0.69             | 0.76              | 0.5                         | 0.46             | 0.65               | 0.68                               | 0.8                    |
|                             |                     |               |                |                  |                   |                             |                  |                    |                                    |                        |
| bloom                       | SML<br>n=15         | 1.21<br>±0.00 | 0.45<br>±0.01  | 0.51<br>±0.03    | 7.08<br>±0.42     | 0.28<br>±0.00               | 0.53<br>±0.02    | 0.35<br>±0.02      | 0.56<br>±0.10                      | 0.12<br>±0.04          |
|                             | ULW<br>n=22         | 1.20<br>±0.01 | 0.46<br>±0.01  | 0.52<br>±0.04    | 6.60<br>±0.43     | 0.29<br>±0.01               | 0.53<br>±0.02    | 0.34<br>±0.02      | 0.51<br>±0.14                      | 0.08<br>±0.02          |
|                             | t-test /<br>p-value | 0.04<br>*     | 0.32           | 0.52             | 0.0017<br>**      | 0.24                        | 0.56             | 0.65               | 0.23                               | 0.0011<br>**           |
|                             |                     |               |                |                  |                   |                             |                  |                    |                                    |                        |
| post-bloom                  | SML<br>n=16         | 1.22<br>±0.01 | 0.46<br>±0.01  | 0.48<br>±0.05    | 8.83<br>±0.89     | 0.27<br>±0.01               | 0.57<br>±0.05    | 0.31<br>±0.02      | 1.06<br>±0.29                      | 0.14<br>±0.03          |
|                             | ULW<br>n=26         | 1.22<br>±0.01 | 0.46<br>±0.01  | 0.46<br>±0.06    | 7.71<br>±0.51     | 0.28<br>±0.00               | 0.56<br>±0.07    | 0.30<br>±0.03      | 0.64<br>±0.26                      | 0.10<br>±0.04          |
|                             | t-test /<br>p-value | 0.17          | 0.76           | 0.39             | <0.001<br>***     | 0.072                       | 0.66             | 0.44               | <0.001<br>***                      | 0.005<br>**            |
|                             |                     |               |                |                  |                   |                             |                  |                    |                                    |                        |
| <sup>1</sup> Mid-Bay        | SML                 | 1.44<br>±0.41 | 0.295<br>±0.20 |                  |                   |                             |                  |                    |                                    |                        |
|                             | ULW                 | 1.50<br>±0.40 | 0.332<br>±0.22 |                  |                   |                             |                  |                    |                                    |                        |
| <sup>2</sup> Upper estuary  | SML                 | 1.23          | 0.46           | 0.21             |                   |                             |                  |                    |                                    |                        |
|                             | ULW                 | 1.22          | 0.45           | 0.20             |                   |                             |                  |                    |                                    |                        |
| <sup>2</sup> Middle estuary | SML                 | 1.25          | 0.47           | 0.23             |                   |                             |                  |                    |                                    |                        |
|                             | ULW                 | 1.23          | 0.47           | 0.20             |                   |                             |                  |                    |                                    |                        |
| <sup>2</sup> Marine station | SML                 | 1.27          | 0.48           | 0.21             |                   |                             |                  |                    |                                    |                        |
|                             | ULW                 | 1.25          | 0.49           | 0.17             |                   |                             |                  |                    |                                    |                        |
| <sup>3</sup> North SW       |                     |               |                | 0.63<br>±0.01    | 11.9<br>±0.8      |                             |                  |                    |                                    |                        |
| <sup>4</sup> North SW       |                     | 1.26<br>±0.01 | 0.40<br>±0.03  |                  | 12<br>±0.02       | 0.28<br>±0.02               |                  |                    |                                    |                        |
| NEqPIW                      | n=6                 | 1.26<br>±0.00 | 0.46<br>±0.00  | 0.84<br>±0.01    | 4.69<br>±0.12     | 0.23<br>±0.00               | 0.02<br>±0.01    | 0.27<br>±0.02      | 0.14<br>±0.02                      | 0.02<br>±0.12          |

Averages (± standard deviation) were calculated from experimental replicates

p-value significance: \* (< 0.05), \*\* (< 0.01), and \*\*\* (< 0.001)

90 *North SW* North Sea seawater, *NEqPIW* North Pacific Equatorial Intermediate Water

<sup>1</sup>Burdette et al. (2022), June 2019. Quadrupole time-of-flight MS data (qToF-MS)

<sup>2</sup>Lechtenfeld et al. (2013), May 2009

<sup>3</sup>Waska and Banko-Kubis (2024), June 2020

<sup>4</sup>Amoako et al. (2025), October 2022

## References

- Abdulla, H. A. N.; Minor, E. C.; Dias, R. F.; Hatcher, P. G. Changes in the compound classes of dissolved organic matter along an estuarine transect: A study using FTIR and  $^{13}\text{C}$  NMR. *Geochim. Cosmochim. Acta* **2010**, 74 (13), 3815–3838. <https://doi.org/10.1016/j.gca.2010.04.006>
- 100 Amoako, K., Reckhardt, A., Roberts, M., Meyer, R., Brick, S., Dittmar, T., Waska, H., 2025. Organo-mineral interactions modulate organic carbon retention and mobility in a deep subterranean estuary of a high-energy beach. *Front. Water* 7. <https://doi.org/10.3389/frwa.2025.1507564>
- Artz, R. R. E.; Chapman, S. J.; Robertson, A. H. J.; Potts, J. M.; Laggoun-Défarge, F.; Gogo, S.; Comont, L.; Disnar, J.-R.; Francez, A.-J. FTIR spectroscopy can be used as a screening tool for organic matter quality in regenerating cutover peatlands. *Soil Biol. Biochem.* **2008**, 40 (2), 515–527. <https://doi.org/10.1016/j.soilbio.2007.09.019>
- 105 Božič, M.; Elschner, T.; Tkaučič, D.; Bračič, D.; Bračič, M.; Hribernik, S.; Stana-Kleinschek, K.; Kargl, R. Effect of different surface-active polysaccharide derivatives on the formation of ethyl cellulose particles by the emulsion–solvent evaporation method. *Cellulose* **2018**, 25, 6901–6922. <https://doi.org/10.1007/s10570-018-2062-2>
- Burdette, T.C., Bramblett, R.L., Deegan, A.M., Coffey, N.R., Wozniak, A.S., Frossard, A.A., 2022. Organic Signatures of Surfactants and Organic Molecules in Surface Microlayer and Subsurface Water of Delaware Bay. *ACS Earth Space Chem.* 6, 2929–2943. <https://doi.org/10.1021/acsearthspacechem.2c00220>
- 110 Ji, Y.; Yang, X.; Ji, Z.; Zhu, L.; Ma, N.; Chen, D.; Jia, X.; Tang, J.; Cao, Y. DFT-calculated IR spectrum amide I, II, and III band contributions of N-methylacetamide fine components. *ACS Omega* **2020**, 5 (15), 8572–8578. <https://doi.org/10.1021/acsomega.9b04421>
- 115 Laurson, P.; Raudsepp, P.; Kaldmäe, H.; Kikas, A.; Mäeorg, U. The deconvolution of FTIR-ATR spectra to five Gaussians for detection of small changes in plant–water clusters. *AIP Adv.* **2020**, 10 (8), 085214. <https://doi.org/10.1063/5.0011700>
- Lechtenfeld, O.J., Koch, B.P., Gašparović, B., Frka, S., Witt, M., Kattner, G., 2013. The influence of salinity on the molecular and optical properties of surface microlayers in a karstic estuary. *Marine Chemistry* 150, 25–38. <https://doi.org/10.1016/j.marchem.2013.01.006>
- 120 Lu, R.; Gan, W.; Wu, B.-H.; Zhang, Z.; Guo, Y.; Wang, H.-F. C–H stretching vibrations of methyl, methylene, and methine groups at the vapor/alcohol (n = 1–8) interfaces. *J. Phys. Chem. B* **2005**, 109 (29), 14118–14129.
- Minor, E. C.; Stephens, B. Dissolved organic matter characteristics within the Lake Superior watershed. *Org. Geochem.* **2008**, 39 (11), 1489–1501. <https://doi.org/10.1016/j.orggeochem.2008.08.001>
- Pärnpuu, S.; Astover, A.; Tõnutare, T.; Penu, P.; Kauer, K. Soil organic matter qualification with FTIR spectroscopy under different soil types in Estonia. *Geoderma Reg.* **2022**, 28, e00483. <https://doi.org/10.1016/j.geodrs.2022.e00483>
- 125 Socrates, G. *Infrared and Raman Characteristic Group Frequencies: Tables and Charts*, 3rd ed.; John Wiley & Sons: Chichester, 2001.
