# Supplementary material for: Buoyancy and polarity driven accumulation of dissolved organic matter in the sea surface microlayer during a phytoplankton bloom
Source: Copernicus journal article supplement (doi:10.5194/egusphere-2025-6563), 2026-01-13
Supplement: Supplementary file [file egusphere-2025-6563-AC1-supplement.pdf]

## **Reviewer 1**

**Review of the manuscript "Buoyancy and polarity driven accumulation of dissolved organic matter in the sea surface microlayer during a phytoplankton bloom" by Zobelein et al.**

**The authors investigated the evolution of the sea surface microlayer (SML) during an artificially induced phytoplankton bloom in a mesocosm experiment. Using this approach, they aimed to identify the major film-forming organic matter, assess the influence of polarity and organic matter buoyancy, and evaluate the role of photodegradation.**

**There are too many abbreviations used throughout the manuscript. I suggest minimizing their use, and in particular reconsidering the abbreviation "MF" for molecular formula.**

We agree with the reviewer's assessment. Accordingly, throughout the manuscript, we will revise our abbreviation scheme to make the manuscript easier to follow.

**In light of the growing emphasis on Open Science, I do not think the manuscript should be published unless the raw data are made openly available, either through a public repository or in the Supplementary Materials.**

All data will be made available in PANGAEA, and in the revised manuscript, we will provide the corresponding DOI.

### **L 60 - ... the OM composition ...**

Thank you for pointing that out. L 60 will be updated accordingly.

### **L 76 - ... in the SML...**

Thank you for pointing that out. L 76 will be updated accordingly.

### **L 155 – What was the final concentration of HgCl<sub>2</sub> in the sample?**

L155 will be changed to: "All nutrient samples were poisoned immediately with a saturated mercury chloride (HgCl<sub>2</sub>) solution (0.02% of the sample volume), and stored at 4 °C for further analysis. "

**L 350 – 364 – It was not easy for me to follow the text and Fig. 4. I suggest providing more detailed connections between the text and the sub-figures. For example, the sentence: "In contrast, increasing SML compartmentalisation was noticed for the intensity weighted molecular lability boundary (H/C > 1.5, MLB<sub>wL</sub>), the humic-like fluorescent DOM (FDOM), and finally the w.a. of carbohydrate-, lipid- and protein-like fractions of the DOM pool (Fig. 4 b, h, i, k, Tab. 2)." should be written as follows: In contrast, increasing SML compartmentalisation was noticed for the intensity weighted molecular lability boundary (H/C > 1.5, MLB<sub>wL</sub>) (Fig. 4b) , the humic-like fluorescent DOM (FDOM) (Fig. 4?), and finally the w.a. of carbohydrate-, lipid- and protein-like fractions of the DOM pool (Fig. 4 x, y, z, respectively, Tab. 2).**

We agree that our sentence structure can be improved in some places. We will do our best to reword nested sentences to improve the readability.

L 350 "In contrast, increasing SML compartmentalisation was noticed for the intensity weighted molecular lability boundary (H/C > 1.5, MLB<sub>wL</sub>) (Fig. 4 b), the humic-like fluorescent DOM (FDOM) (Fig. 4 k), and finally the weighed average of carbohydrate-, lipid-like and protein-derived fractions of the DOM pool (Fig. 4 h, i, j, k, respectively Tab. S3). The compartmentalisation was distinct and consistent despite a concurrent overall increase in the ULW (e.g. in the MLB<sub>wL</sub>, Fig. 4 b), or overall decreases in both, SML and ULW (e.g. FDOM, Fig. 4 k). Specifically, in the SML, the sum of the normalised intensities of laminarin-derivative formulas increased abruptly in the SML during the bloom phase (Fig. 5). Furthermore, these formulas showed a diurnal trend, where samples taken before sunrise had higher laminarin-like signal intensities than those taken in the afternoon. "

**L 354 – The term “highly unsaturated formula” is not defined anywhere in the manuscript. Please clarify what is meant by this term (e.g., does it refer to compounds with more than a certain number of double bonds?).**

Thank you for pointing this out. We are defining the highly unsaturated compound class by the weighted average of compounds with a modified aromaticity index equal to or above 0.50 and a H/C ratio above 1.5 ( $AI_{\text{mod}} \leq 0.50$  and  $H/C < 1.5$ ). That includes phenols such as soil-derived products of lignin degradation (Seidel et al., 2014 <https://doi.org/10.1016/j.gca.2014.05.038>). We will add this definition in the Method section (L 238).

**L 365-367 – This sentence should be revised for clarity.: While both parameters increased in the SML after the bloom, the latter decreased during the pre-bloom phase, reaching the lowest values in the middle of the bloom phase.**

The development of the SPE-DOC/SPE-DON ratio (Fig. S4 a) will be incorporated into paragraph L328, which describes bulk parameters with increased compartmentalisation. The O/H plot (Fig. S4 b) will be removed from the supplementary material. The O/H trend is less conclusive and does not significantly contribute to our line of argument.

The paragraph will be changed to: “DOC concentrations and the DOC/DON ratio in the SML compartmentalised in tandem with the increase of Chla during the bloom phase (Fig. 3 a,d; Tab. 1). Throughout the bloom, SML DOC was enriched compared to ULW, despite an overall increase in the ULW DOC (EF, Fig. 3 e). This enrichment increased drastically during the bloom and the post-bloom phase. Both SML and ULW maintained high DOC concentrations after the bloom, despite Chla levels dropping in the post-bloom phase. The SPE-DOC/SPE-DON ratio remained stable and within the same range between the ULW and SML during the pre-bloom and bloom stages (Fig. S4). As the bloom progressed, the ratio increased abruptly in the SML, leading to compartmentalisation as Chla levels dropped. This compartmentalisation grew during the post-bloom phase, even though the ULW SPE-DOC/SPE-DON ratio also increased. In the SML, the ratio reached its highest point midway through the post-bloom period and then decreased, eventually aligning with the ULW level.”

**L 369 – Where are these data presented? So, it should be written: The DOC extraction efficiency (EE) (Table 1). According to Table 1, EE is consistently at least 10% lower in the SML than in the ULW, rather than 20%.**

As suggested by the reviewer, the sentence (L369) should read as: "The DOC extraction efficiency (Tab. 1) was consistently at least 10% lower in the SML than in the ULW samples and decreased during the bloom phase in both the SML and ULW, before returning to pre-bloom levels during the post-bloom phase."

**L 371 – The term “permeating DOC” is not explained in the main text. This definition should be provided here rather than only in the table caption.**

As suggested by the reviewer, we have added a description in the method section and a short reminder in the results. Like "the DOC-fraction from the sample that is not retained by the PPL-cartridge was collected and will be hereafter referred to as permeated DOC". (L172, L371, L456)

**L 373 – EE is mentioned only 3 times in the text so I suggest to use full name.**

As suggested by the reviewer, we spell out extraction efficiency in the revised manuscript (L368, L528).

**L 380 – Fig. 4: I would appreciate it if all abbreviations were defined in the figure captions, as repeatedly searching the text for their meanings is time-consuming and tiring.**

Thank you for pointing this out. We checked all figure captions and have explained all abbreviations in the revised manuscript.

***Also, there is missing y-axis names for 4a, 4c and 4l.***

Thank you for this comment. We point out that 4 a, 4 c, and 4 l depict molecular indices that, by definition, are unitless. In the headline, we already define which index is depicted; therefore, no further information is required to accurately show the relative index abundances.

***L 434-435\_... decreased significantly in the SML...when or where?***

Here, we refer to the relative change in protein band intensity, as shown in Fig. S5 b. Although the absolute protein band intensity slightly increases (Fig. 4 j), its relative contribution to the overall spectral intensity IC decreases during the post-bloom period (Fig. S5 b). The opposite trend occurs simply because the increase in other signal contributions (i.e., the carbohydrate signal) is more pronounced, so the relative protein contribution decreases despite a marginal absolute increase.

***L 453 – lipids also may contribute to high DOC/DON ratio***

Thank you for your suggestion. We conducted a literature review on lipid contributions to *in situ* produced biomass in late bloom stages. Although lipids are known to account for a high fraction of carbon fixation ( $23 \pm 11\%$ , Becker et al., 2018, <https://doi.org/10.1038/s41467-018-07346-z>), there is no evidence that this is also true for the DOC fraction, which we investigate in our study. In the DOC fraction, only low levels of fatty acids (3%; Kattner et al., 1983, [https://doi.org/10.1016/0304-4203\(83\)90039-7](https://doi.org/10.1016/0304-4203(83)90039-7)) or lipids (<1%; Mannino & Harvey, 2002, <https://ntrs.nasa.gov/citations/20030020914>) have been reported. Furthermore, Engel et al. (2002, <https://doi.org/10.4319/lo.2002.47.3.0753>) found that after nitrate depletion during post-bloom stages, a large portion of carbon is directed into polysaccharides with a C:N ratio of around 20. This suggests that lipid contributions to the DOC/DON ratio merely account for the observed discrepancies. Note that this may vary between POC and dry-mass lipid fractions, with lipid content potentially reaching 25% (H. Rai et al., 1997, <https://doi.org/10.1046/j.1365-2427.1997.00227.x>; Becker et al., 2018, <https://doi.org/10.1038/s41467-018-07346-z>).

We included this in the discussion in the revised version (L452): “We detected a significant accumulation of up to 600  $\mu\text{M}$  DOC in the SML, along with an elevated DOC/DON ratio after the bloom (Fig. 3) that exceeded the Redfield ratio. This higher DOC/DON ratio is likely mainly due to *in situ* carbohydrate production, with a smaller contribution from lipid biosynthesis (Hammer and Kattner, 1986, <https://doi.org/10.3354/meps031035>; Mannino & Harvey, 2002; Van Den Meersche et al., 2004, <https://doi.org/10.4319/lo.2004.49.3.0862>).”

***L 459 – Did the authors consider OM photochemical degradation, which often produces oxidized species as an initial step? This may be important particularly for the SML.***

Thank you for your suggestion. However, analysing oxidised compounds as you proposed is not feasible because we only calculated weighted averages of the O/C ratio. While those reactions could happen, the specific photo-degraded compounds might not influence the overall O/C ratio of the sample.

Valderrama et al. (2025, <https://doi.org/10.5194/bg-23-1965-2026>), in the same special issue, explore the photochemical formation and breakdown of carbonyl compounds and examine the oxidation capacity in both ambient SML and underlying water (ULW). However, Fourier-transform ion-cyclotron mass spectrometry (FT-ICR-MS) cannot identify specific structural motifs such as carbonylic functionalities.

In our research, we used photodegradation indicators like the loss of photosensitive compounds (Bercovici et al., 2023, <https://doi.org/10.1021/acs.est.3c05929>), the breakdown of humic-like FDOM (Moran et al., 2000, <https://doi.org/10.4319/lo.2000.45.6.1254>), and the reduction of aromatic compounds (Stubbins and Dittmar, 2015, <https://doi.org/10.1016/j.marchem.2015.06.020>).

**L 467 - S5).**

Thank you for pointing that out. L467 has been updated.

**L 486 - ...in microalgae...**

Thank you for pointing that out. L486 has been updated.

**L 499 - C. Closterium**

Thank you for pointing that out. L499 has been updated.

**L 534 – 535 – I suggest that the authors reconsider this statement. Specifically, alternative explanations should be considered, such as the possibility that POM had already been degraded to CO<sub>2</sub>. It is well established that the turnover time of fresh carbohydrates is very short. Harvey et al. (1995; [https://doi.org/10.1016/0016-7037\(95\)00217-N](https://doi.org/10.1016/0016-7037(95)00217-N)) showed that turnover times among particulate pools are shortest for carbohydrates, ranging from approximately 10.7 days for diatom and cyanobacterial carbohydrates. Furthermore, Becker et al. (2020; [doi:10.1073/pnas.1917001117](https://doi.org/10.1073/pnas.1917001117)) measured hydrolysis rates of 0.1–34 nmol L<sup>-1</sup> h<sup>-1</sup>, indicating rapid enzymatic degradation of laminarin in the ocean. This comment is particularly relevant given that the mesocosm experiment lasted 33 days, with at least 10 days following bloom decay.**

Good point. Unfortunately, we do not have data on the POM concentrations in the SML due to sample limitations. It is definitely a limitation of our study that it ends 10 days after the bloom. To gain better insight into degradation and remineralisation, a longer observation of the post-bloom phase would have been highly informative.

What we detect are molecular fragments that actually indicate the degradation of laminarin, as our fragments are all below 1000 Da. We argue that these are degradation products of longer-chain laminarin.

Additionally, Aluwihare & Repeta (1999, <https://doi.org/10.3354/meps186105>) argue that phytoplankton exudates, including E. huxleyi DOC in sea surface water, consist of structurally related and biosynthetically derived acyl oligosaccharides that might persist after more labile organic matter has been degraded. So, it might be that the "laminarin-derivative" fraction we are detecting is a residue or degradation product formed by the breakdown of those oligosaccharides, converting them in situ into more bio-accessible, short-chain, low-molecular-weight (LMW) oligosaccharides.

To summarise, the degradation of laminarin may not directly correspond to the degradation of the LMW carbohydrate-like DOM we detected, as we lack information on the POM in the SML.

**L 585 – Fig. 4I**

Thank you for pointing that out. L 585 has been updated accordingly.

**L 599-600 – I do not understand this sentence: "... are more affected than ULW in natural environments where light penetration into the water column is limited to depths < 1 m." as light typically penetrates much deeper than 1 m in seas and oceans.**

The concept was that a strong coupling exists between ULW and SML due to the small basin size, limiting our ability to detect distinct photodegradation effects in these water layers. Nonetheless, in nature, such effects could still occur because the SML is consistently exposed to intense irradiation, while the ULW might mix with deeper water layers. Secchi disk measurements in 2016 (<https://doi.pangaea.de/10.1594/PANGAEA.858721>) near Jade Bay indicated that the disc was not visible below 1 meter, implying minimal light penetration beyond shallow depths of a few meters. The sentence in L598 will be removed.

***L 606, 608, 610, 611 – please write properly E. hux. and C. clos.***

Thank you for pointing that out. L 606, 608, 610 and 611 have been updated accordingly.
